# Supplementary material for: DNA methylation aging and transcriptomic studies in horses
Source: PubMed Central journal article supplement (PMC8748428; doi:10.1038/s41467-021-27754-y), 2022-01-10
Supplement: 41467_2021_27754_MOESM1_ESM.pdf [file 41467_2021_27754_MOESM1_ESM.pdf]

1 **SUPPLEMENTARY INFORMATION**  
2 **for "DNA methylation aging and transcriptomic studies in horses"**  
3 **by Horvath, Haghani et al.**

4  
5 **SUPPLEMENTARY FIGURES**  
6  
7

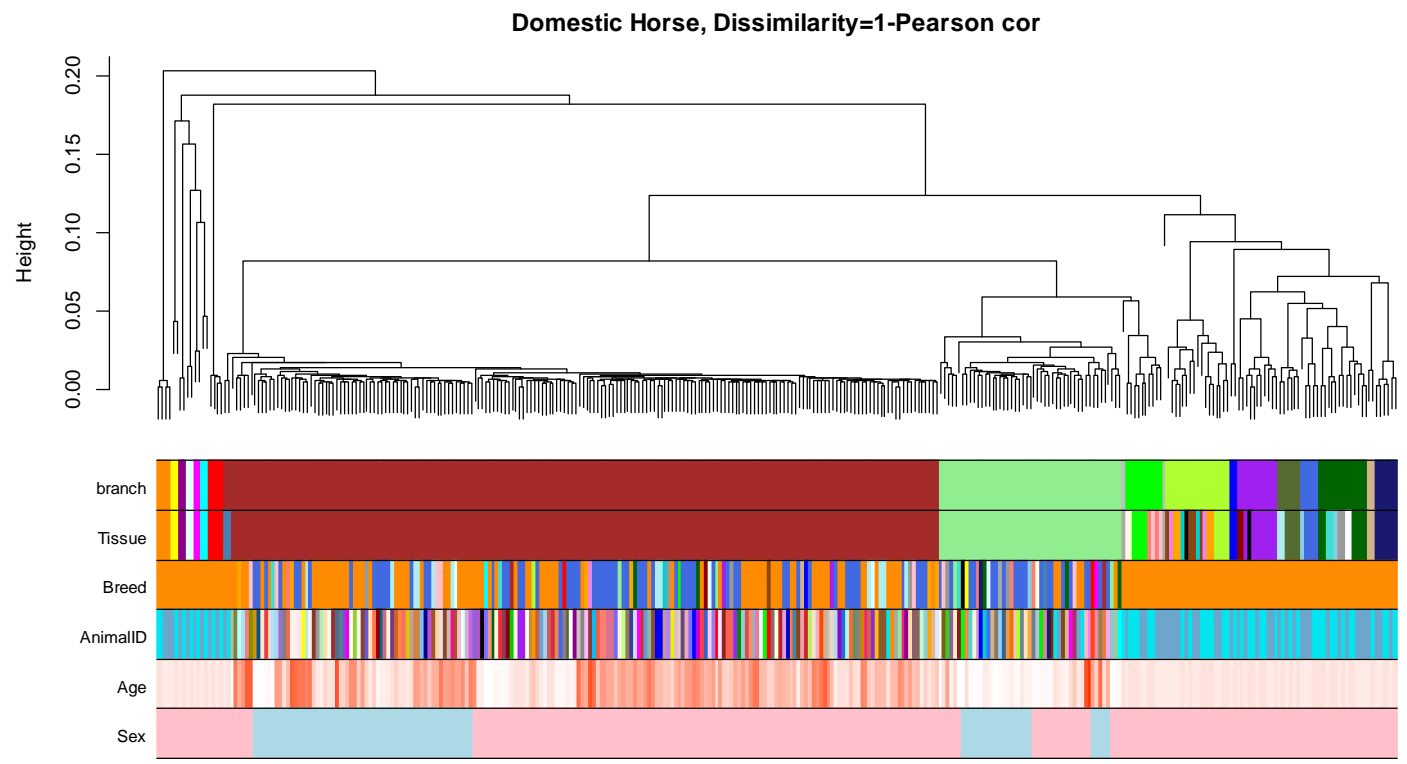

8  
9 **Supplementary Figure S1. Unsupervised hierarchical clustering of samples from domestic horses.**  
10 Average linkage hierarchical clustering based on the inter-array correlation coefficient (Pearson correlation).  
11 The cluster branches (first color band) correspond to tissue type (second color band): brown=blood,  
12 lightgreen=liver, purple=heart, midnightblue=kidney, darkorange=pituitary gland. Third color band encodes  
13 horse breed (darkorange=thorough bred, royalblue=Quarter Horse, paleturquoise=Warmblood,  
14 pink=Hanoverian. Fourth color band visualized the animal ID. Age encodes chronological age (red=old  
15 age). Sex encodes female (pink) and male (lightblue). The figure uses N=333 arrays/tissue samples.  
16  
17

Final Epigenetic Horse and Human-Horse Clocks applied to Zebra Blood Data

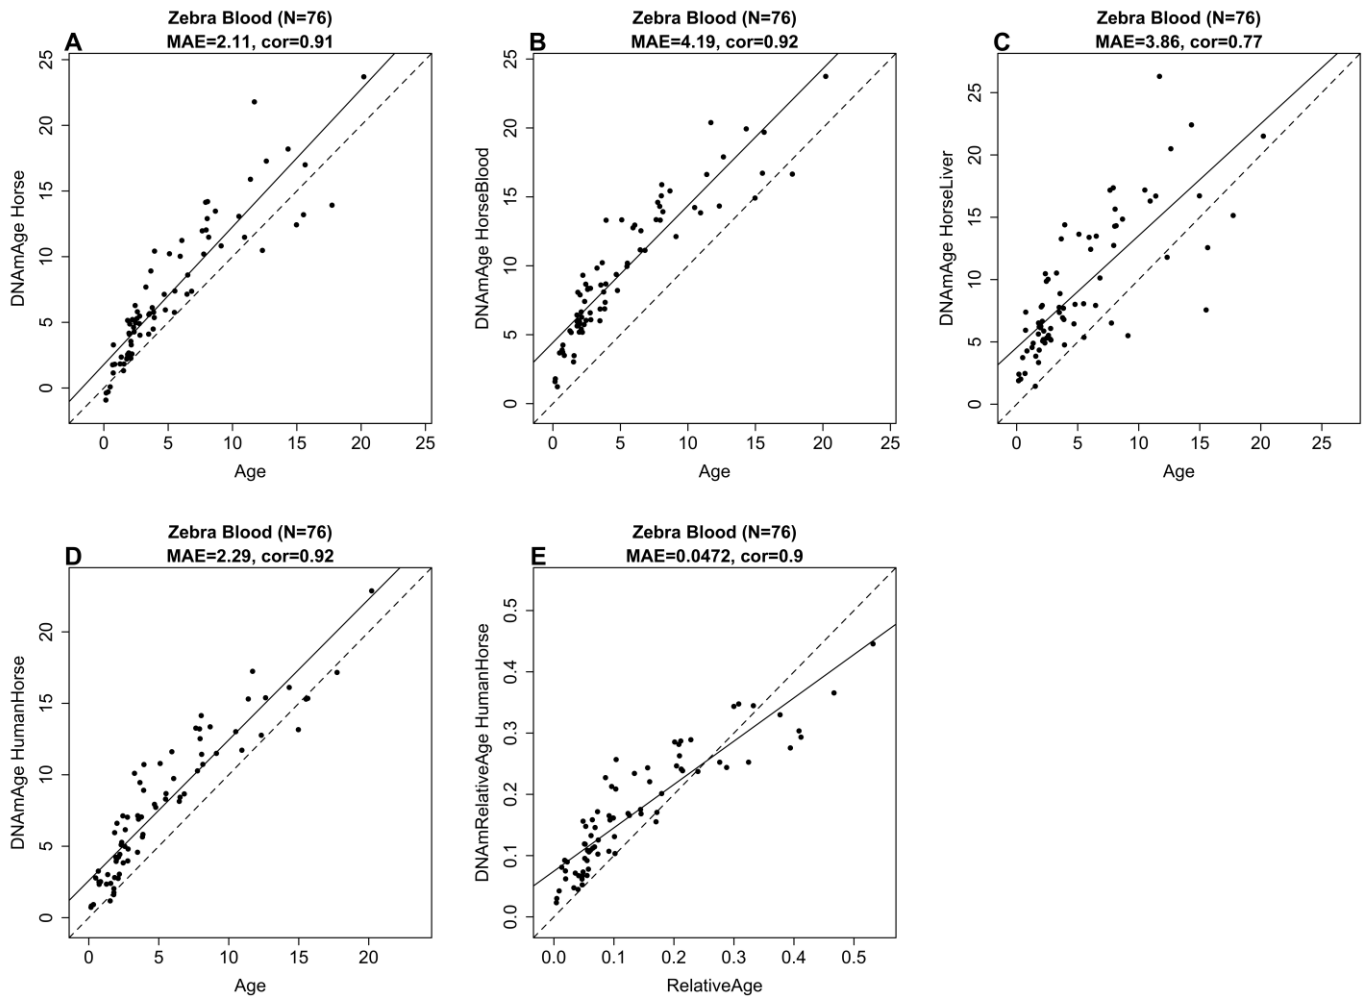

18  
19  
20  
21  
22  
23  
24  
25  
26  
27  
28

**Figure S2. Horse clocks applied to blood samples from plains zebra.** Each dot corresponds to a blood sample from zebras (N=76). Each panel reports the results from a different horse clock (y-axis): A) Multi-tissue clock, B) blood clock, C) liver clock, D) human-horse clock for chronological age, E) human-horse clock for relative age. DNA methylation based age estimates and chronological age are in units of years. Relative age is a number between 0 and 1. The solid line corresponds to linear least squares regression and the diagonal line to  $y=x$ . Each panel reports the number of blood samples (N=76), the median absolute error, and the Pearson correlation coefficient.

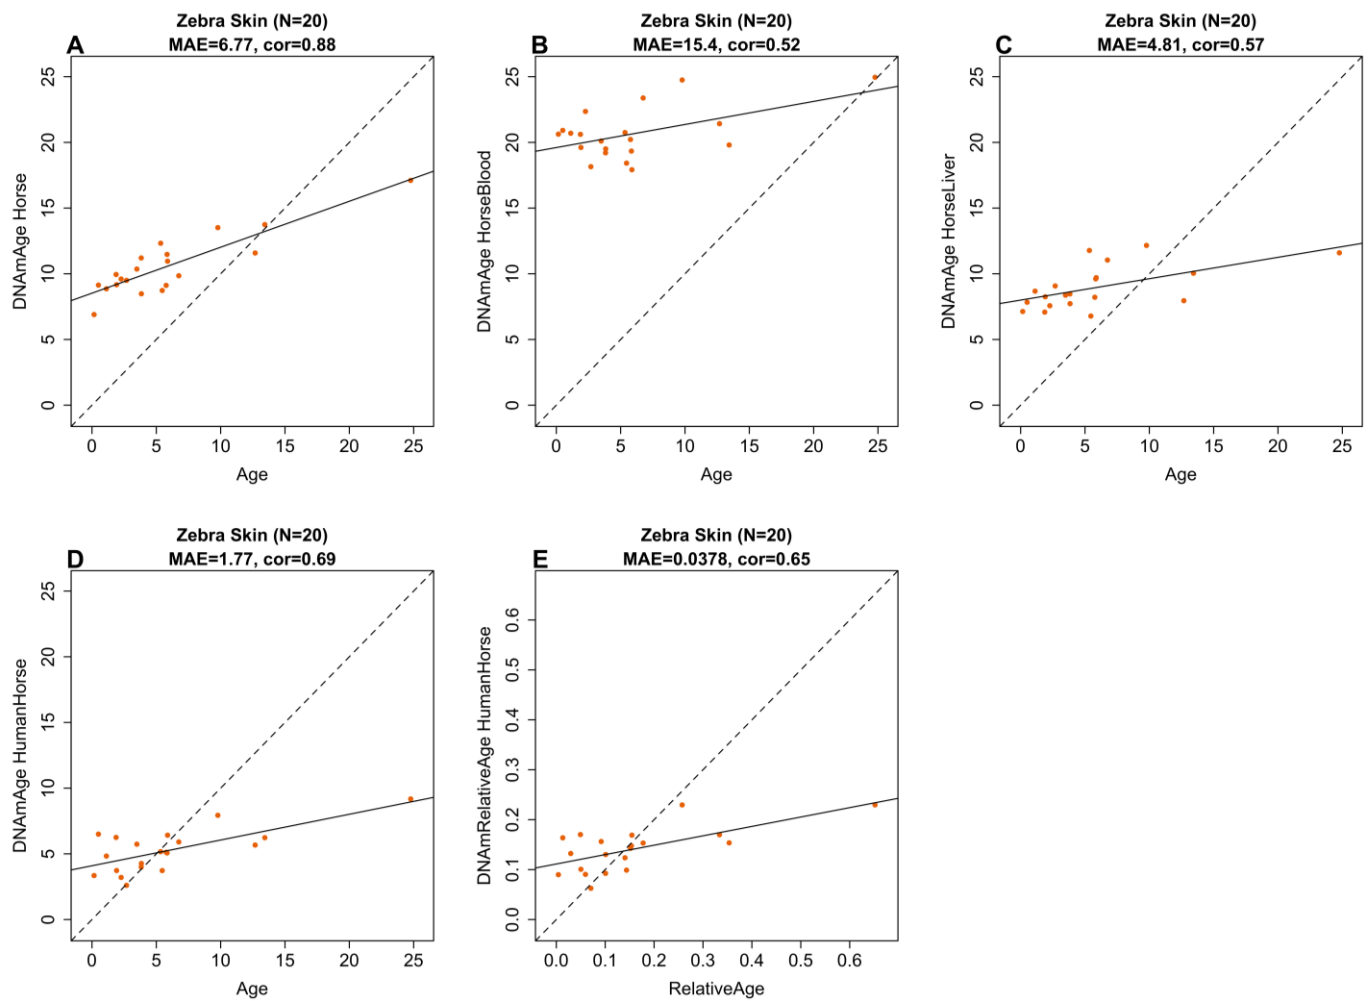

**Figure S3. Horse clocks applied to skin samples from plains zebra.**

Dots correspond to skin samples from zebras. Each panel corresponds to a different horse clock (y-axis): A) Multi-tissue clock, B) blood clock, C) liver clock, D) human-horse clock for chronological age, E) human-horse clock for relative age. The solid line corresponds to linear least squares regression and the diagonal line to  $y=x$ . Each panel reports the number of samples (N=20), the median absolute error and the Pearson correlation coefficient.

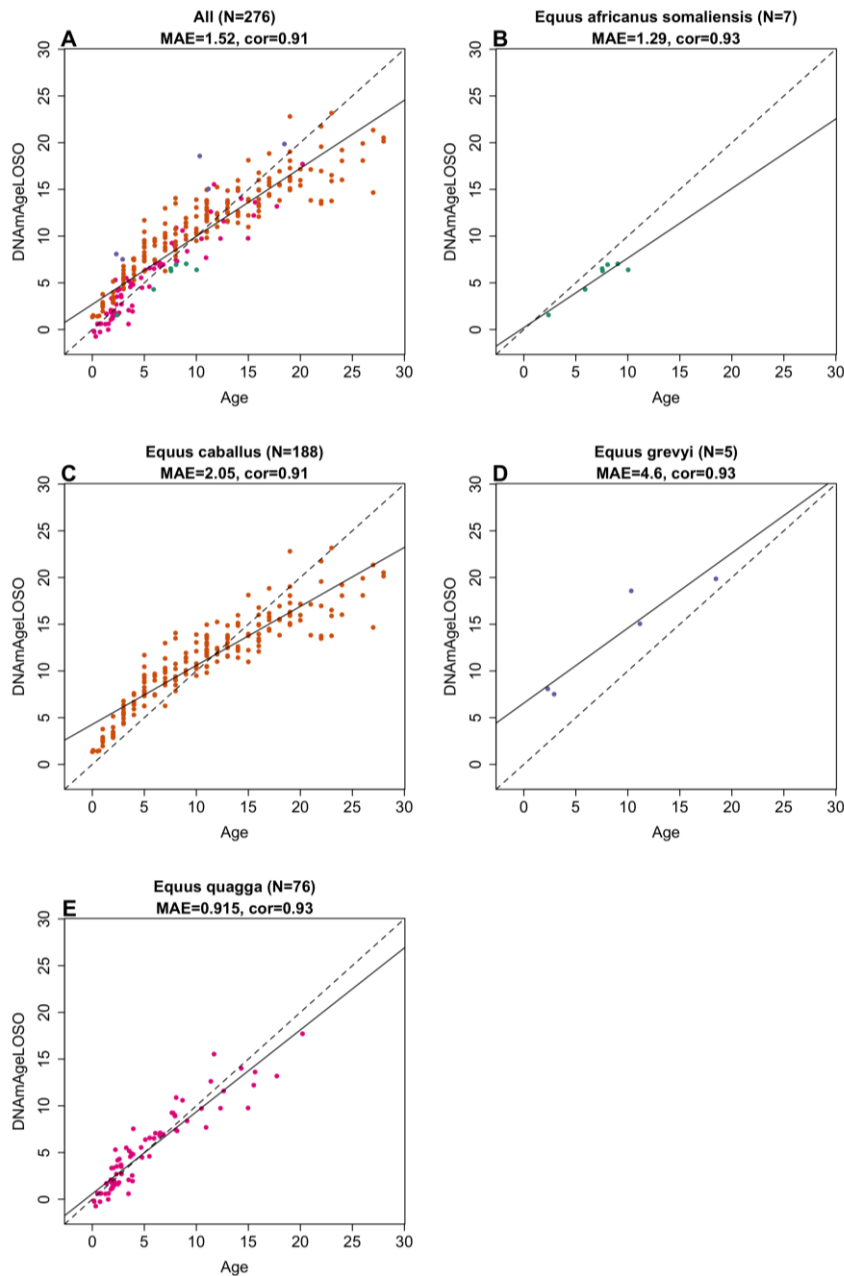

#### Figure S4. Leave-one-species out (LOSO) analysis of equid clock for blood samples.

The LOSO cross validation method is used to evaluate to what extent the equid clock generalizes to equid species that were not part of the training set. The cross validation schemes cycles through species. For each left out species (test set) a new equid clock is trained on the remaining equid species. Next the resulting clock equid clock is evaluated in the left out equid species to arrive at an unbiased DNAm based estimate. B-E) each panel corresponds to a different equid species considered as test set. Each panel reports the number of blood samples (N), the median absolute error (in units of years) and the Pearson correlation coefficient (cor). Cross validation estimate of age (y-axis) versus chronological age in A) all species combined, B) *Equus africanus somaliensis*, C) *Equus caballus*, D) *Equus grevyi*, E) *Equus quagga*. Blood samples (dots) are colored by species as indicated in the respective panels.

Tissue ● Blood ● Liver

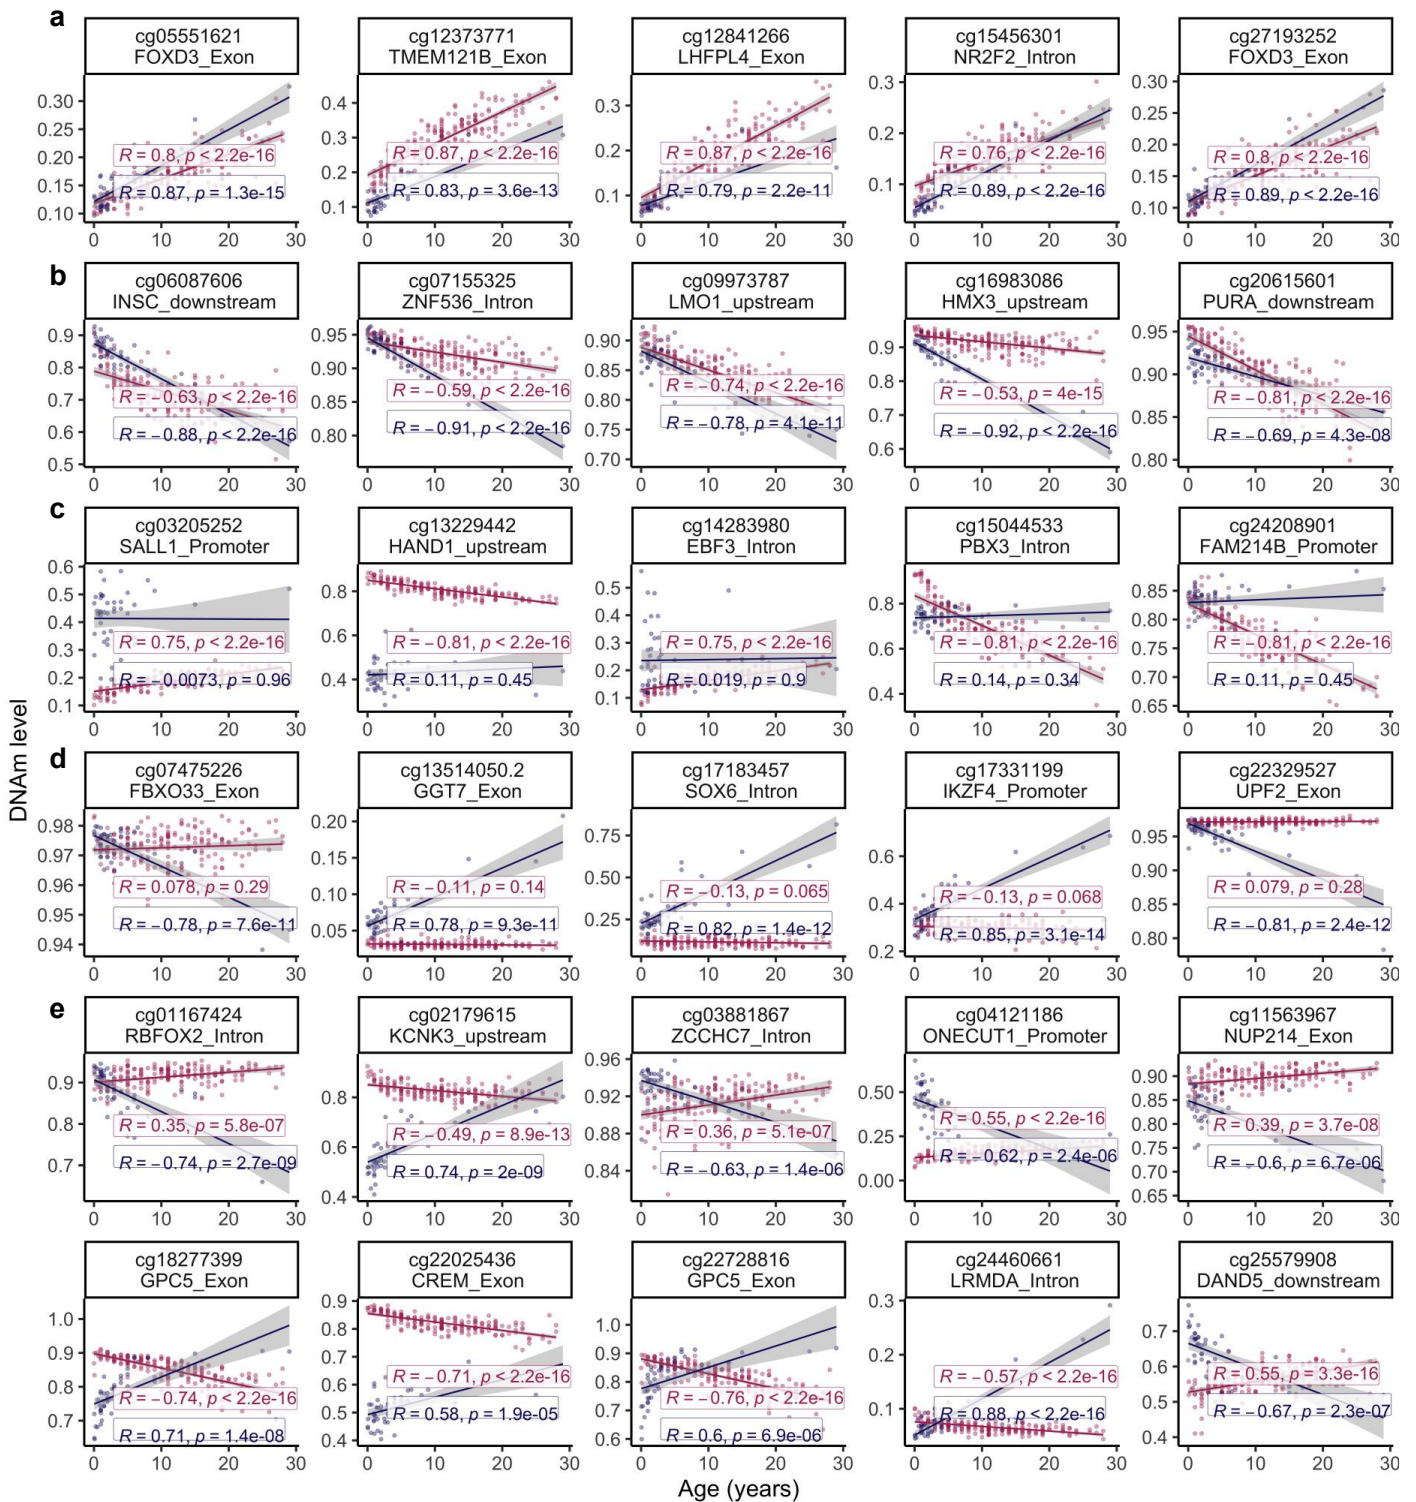

55

56

57

58

59

60

61

**Figure S5. Scatter plots of age-related changes in horse blood and liver.** A) CpGs that gain methylation with age in both blood and liver. B) CpGs that lose methylation with age in both blood and liver. C) Examples of blood specific changes. D) Examples of liver specific changes. E) Select CpGs with divergent aging patterns between blood and liver. Sample sizes: N=192 blood and N=48 liver samples. The panels report Pearson correlation coefficients and corresponding two sided p values (Student T test). The shading is the 95% confidence interval of the linear regression.

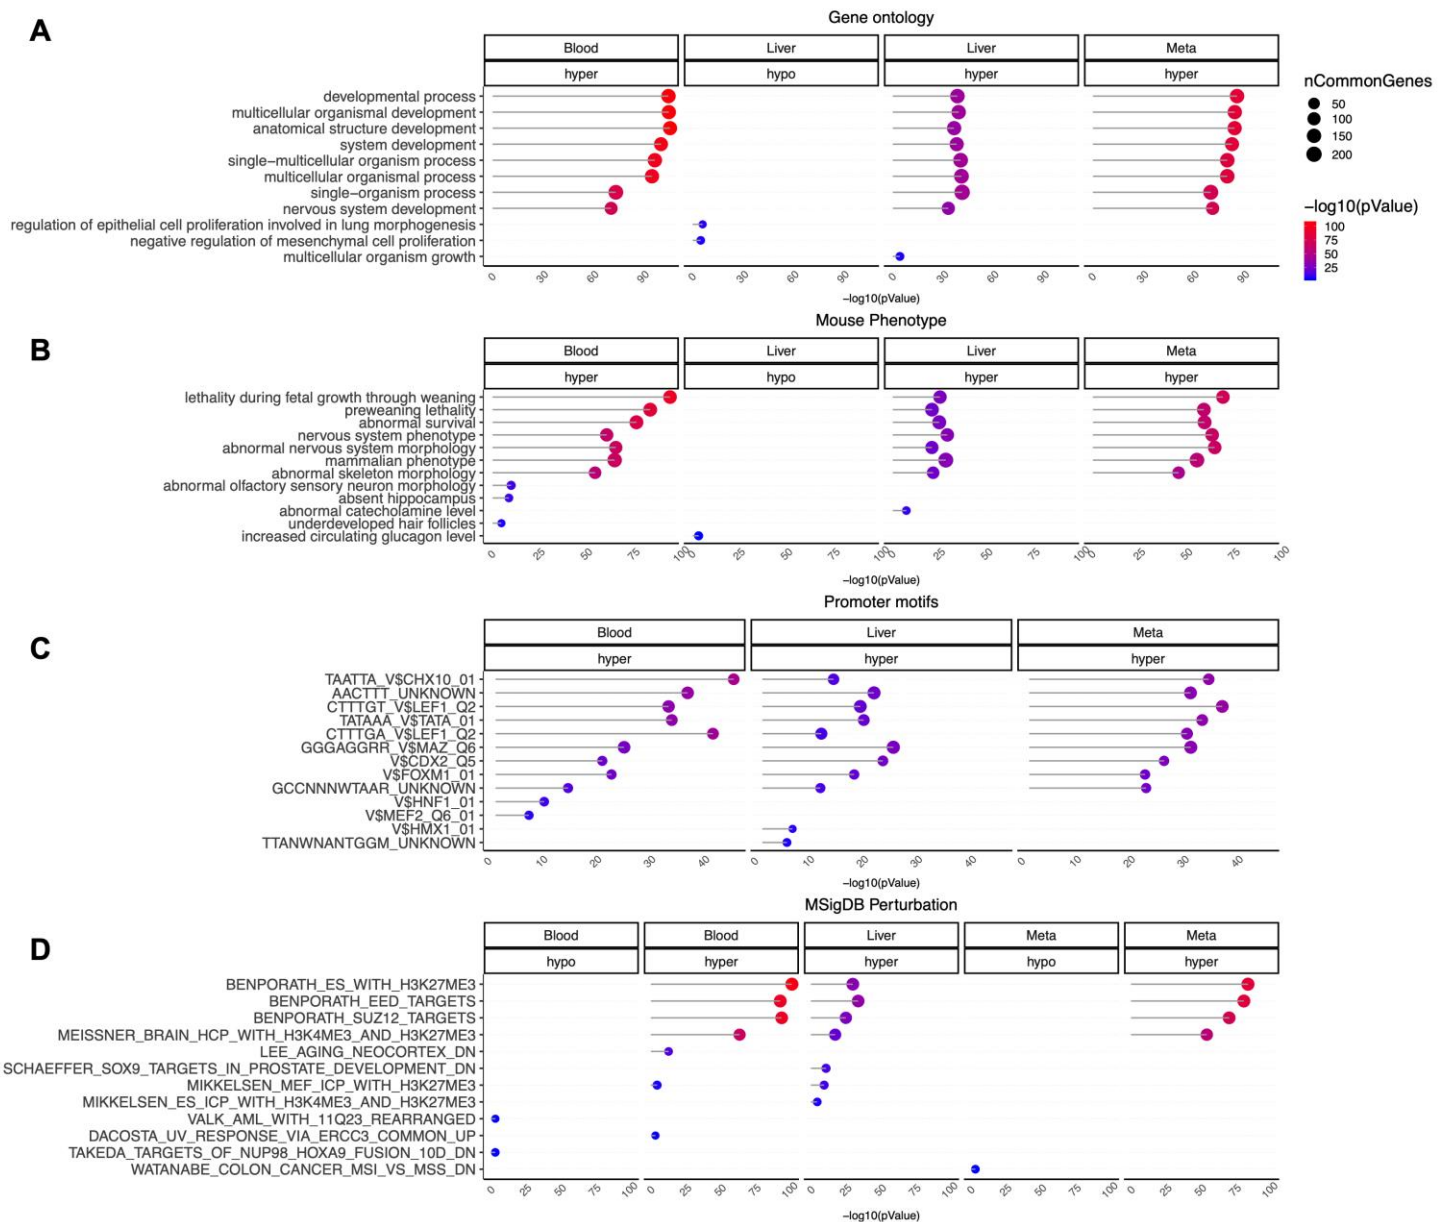

62  
63 **Figure S6. Gene set enrichment analysis of EWAS of age in different horse tissues.** The gene level  
64 enrichment study was conducted with the GREAT software<sup>1</sup>. As statistical background we used all genes on  
65 the mammalian array that map to the horse genome and the human Hg19 background. Datasets: gene  
66 ontology (A), mouse phenotypes<sup>2</sup> (B), promoter motifs<sup>1,3</sup> (C), and MSigDB Perturbation<sup>4,5</sup> (D). The results  
67 were filtered for significance at a nominal significance level of  $p < 10^{-5}$ . We only report findings that led to  
68 significant enrichments, e.g. age related loss of methylation in blood (blood hypo) was omitted. The GREAT  
69 software was used to calculate one sided hypergeometric nominal (uncorrected) p values whose values are  
70 color coded as indicated in the legend.  
71  
72

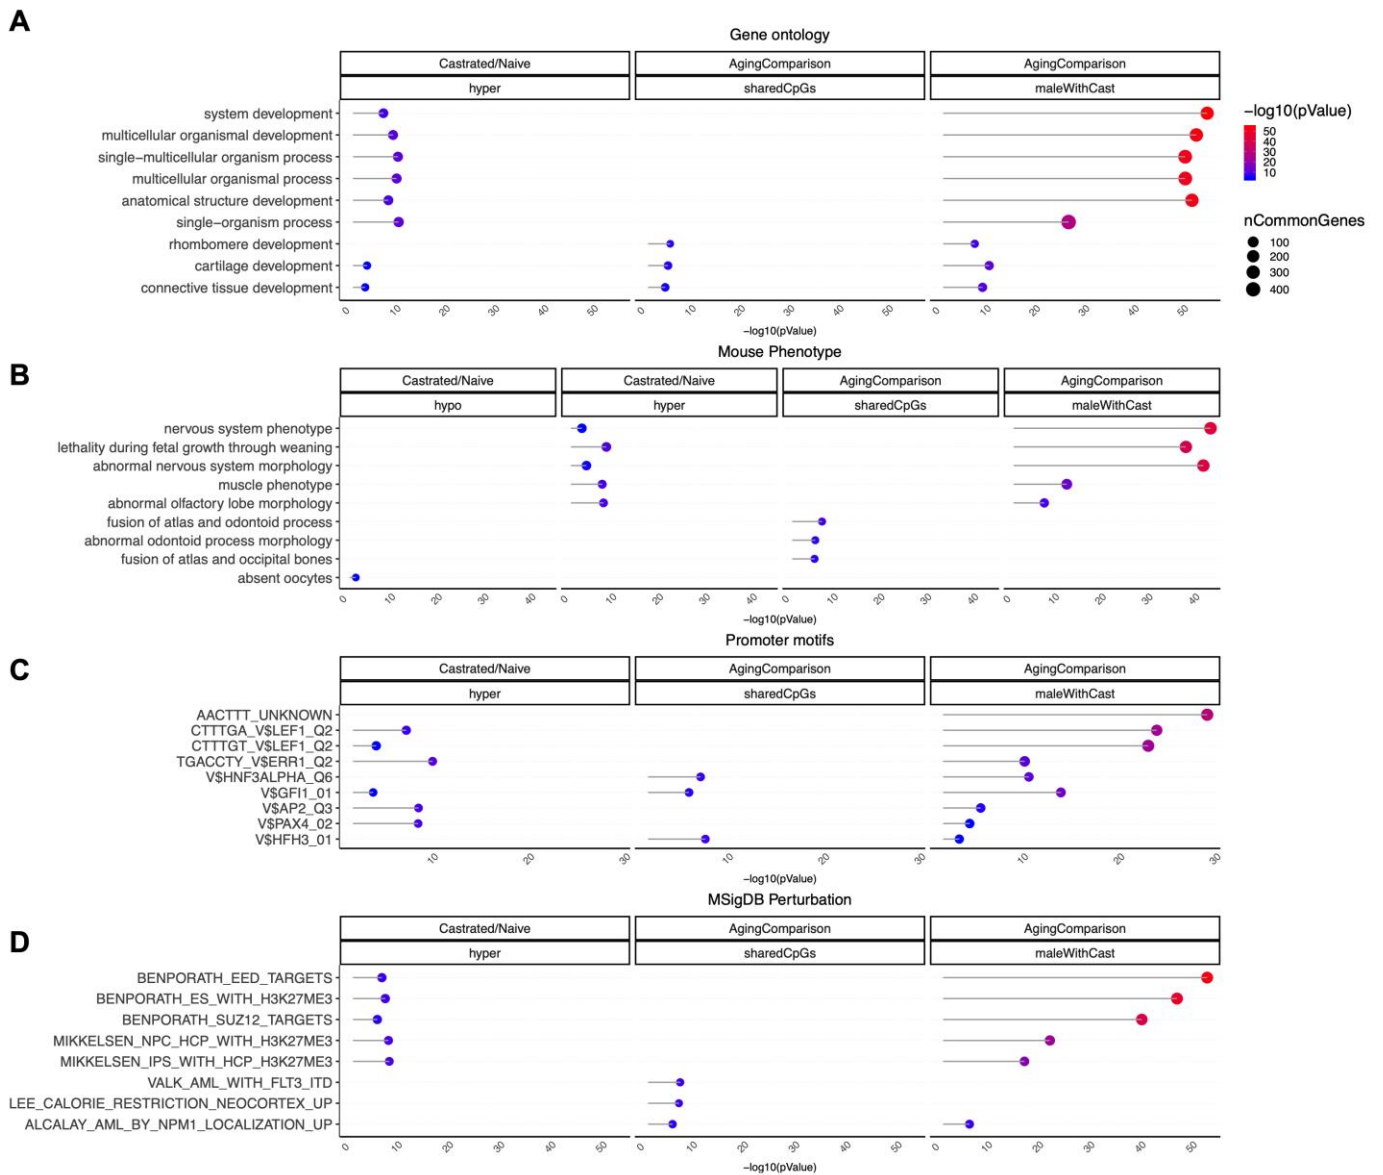

73  
74 **Figure S7. Gene set enrichment analysis of DNA methylation changes by castration.** The gene level  
75 enrichment was done using GREAT analysis<sup>1</sup> and human Hg19 background. Datasets: gene ontology (A),  
76 mouse phenotypes (B), promoter motifs (C), and MSigDB Perturbation (D). The results were filtered for  
77 significance at  $p < 10^{-3}$ . The GREAT software was used to calculate one sided hypergeometric nominal  
78 (uncorrected) p values whose values are color coded as indicated in the legend.  
79  
80

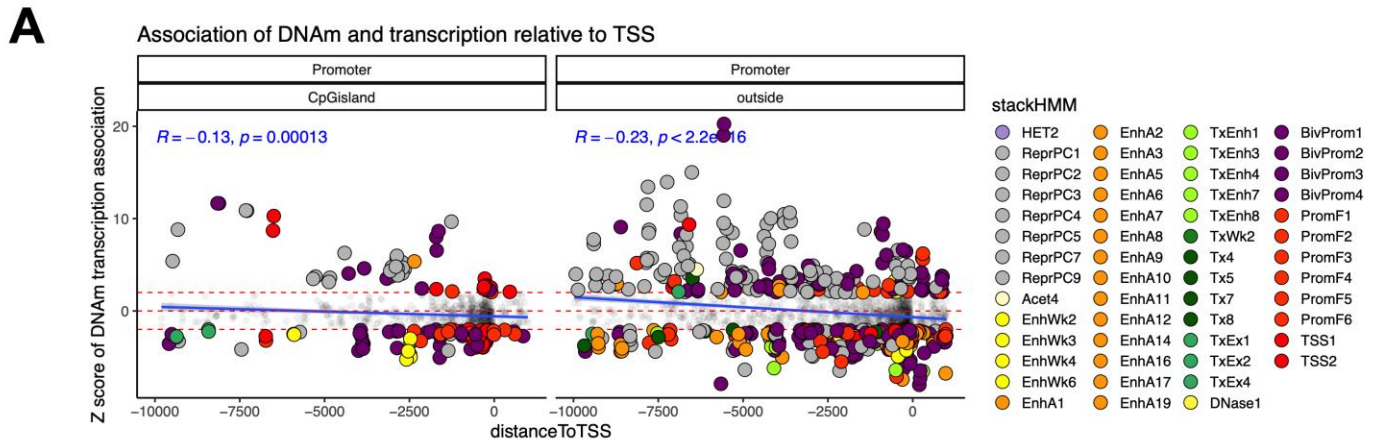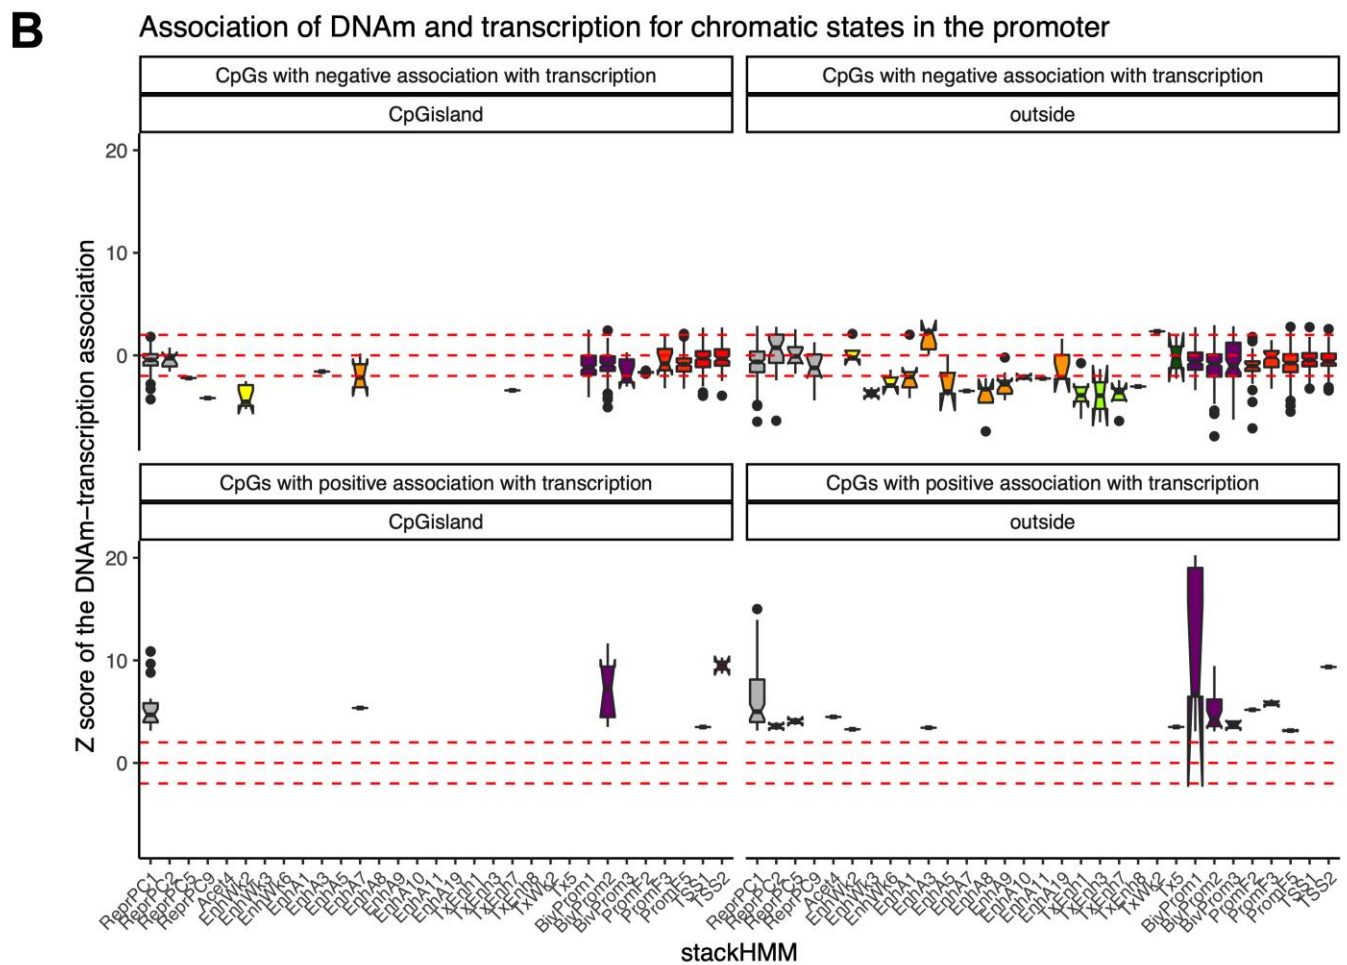

81

82 **Figure S8. Promoter CpG island status does not alter DNAm-mRNA associations.** A) Relationship of  
 83 DNAm, mRNA expression, distance to transcription start site, and chromatin states in the gene promoters by  
 84 CpG island status. The chromatin states are based on the stackHMM annotations, which represent a  
 85 consensus chromatin state in over 100 human tissues<sup>6</sup>. Pearson correlation and corresponding Fisher  
 86 transformed Z statistic (y-axis) between CpG and adjacent mRNA levels (cis-relationship) across N=29  
 87 tissue types from two horses. Red horizontal lines correspond to  $Z = 2$  and  $Z = -2$  (two sided significance level  
 88 of 0.05). B) Boxplots of Z statistics (between CpG and mRNA) versus chromatin states (stackHMM)<sup>7</sup>. Each  
 89 panel corresponds to different input sets of CpGs with significant cis relationship between. The input sets  
 90 are distinguished by 2 criteria: 1) positive/negative association with mRNA and 2) located inside/outside of



91 CpG island status. Boxes show the interquartile range of the z scores. The notches indicate the 95%  
 92 confidence interval of the median. The whiskers represent 1.5\*IQR length of the zscores. We only present  
 93 chromatin states with significant associations ( $p=0.05$ ).  
 94  
 95

### Sensitivity analysis by excluding cerebellum

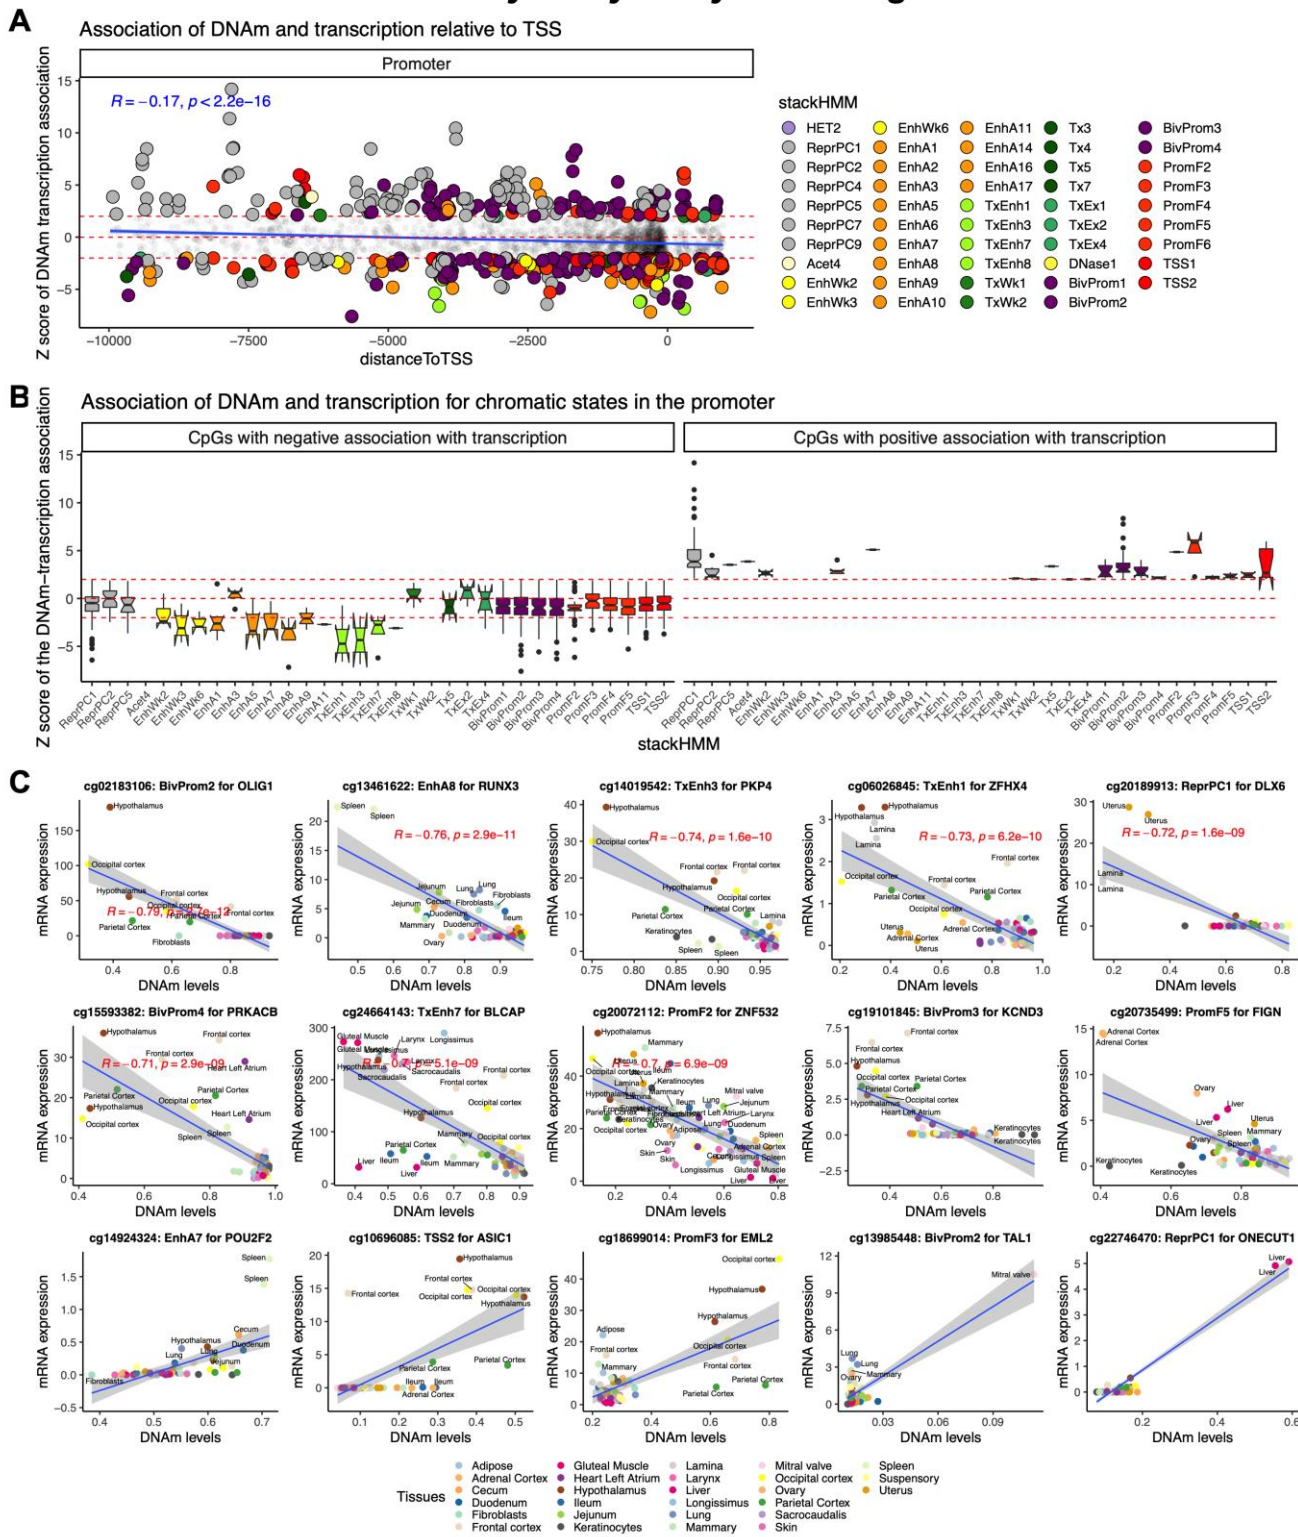

**Figure S9. Sensitivity of analysis DNAm-mRNA association.** Since cerebellum was a tissue with extreme DNAm-mRNA expression signatures in some stackHMM states, the cerebellum was excluded from the analysis. A) Negative association of distance to TSS with DNAm-mRNA expression association was not affected by excluding the cerebellum sample. The Z statistics are the Fisher z-transformation of DNAm-mRNA Pearson correlation for each CpG. B) Excluding the cerebellum did not affect stackHMM relationships with DNAm-mRNA changes. Boxes show the interquartile range of the z scores. The notches indicate the 95% confidence interval of the median. The whiskers represent 1.5\*IQR length of the zscores. C) Scatter plots of select CpGs with DNAm-mRNA association in horse tissues after excluding cerebellum from the analysis. Pearson correlation and corresponding two sided Student T test p values for relating DNAm and mRNA level of the adjacent genes across N=27 tissue types. The shading is the 95% confidence interval of the linear regression.

## Technical Details surrounding the DNAm age estimator

### Statistical methods used for building the clocks

Each epigenetic clock was developed by fitting elastic net regression model analysis (R function glmnet) to the respective training data set. We chose the following parameters for the glmnet R function (alpha: 0.5, CV Fold: 10, Lambda choice for Clock: 1 standard error above minimum CV-MSE).

### Covariates and coefficient values of the horse clocks

The CpGs and coefficient values can be found in **Supplementary Supplementary Data 10**.

- 1) The horse multi tissue clock (trained in blood and liver samples) is based on 97 CpGs whose coefficient values are specified in the column "Coef.HorseMultiTissue". Age transformation=identity, i.e.  $F(\text{Age})=\text{Age}$
- 2) The horse BLOOD tissue clock is based on 60 CpGs whose coefficient values are specified in the column "Coef.HorseBlood". Age transformation=identity, i.e.  $F(\text{Age})=\text{Age}$
- 3) The horse LIVER tissue clock is based on 42 CpGs whose coefficient values are specified in the column "Coef.HorseBlood". Age transformation=identity, i.e.  $F(\text{Age})=\text{Age}$
- 4) The human horse clock for chronological age is based on 435 CpGs whose coefficient values are specified in the column "Coef.HumanHorseLogLinearAge". Age transformation=log-linear described below.
- 5) The human horse clock for relative age is based on 510 CpGs whose coefficient values are specified in the column "Coef.HumanHorseRelativeAge". Age transformation: relative age. i.e.  $F(\text{Age})=\text{Age}/\text{maxLifespan}$ . Max lifespan for horses is 57 years. Human max lifespan =122.5 years.
- 6) The epigenetic clocks for blood samples from equids (column Coef.EquidBloodLogLinearAge) uses 63 CpGs. Age transformation=log-linear described below.

### **General description of age transformation**

The human-horse clocks for chronological age used log linear transformations that are similar to those employed for the HUMAN pan tissue (Horvath 2013) <sup>8</sup>.

An elastic net regression model (implemented in the glmnet R function) was used to regress a transformed version of age on the beta values in the training data. The glmnet function requires the user to specify two parameters (alpha and beta). Since I used an elastic net predictor, alpha was set to 0.5. But the lambda value of was chosen by applying a 10 fold cross validation to the training data (via the R function cv.glmnet).

141 The elastic net regression results in a linear regression model whose coefficients  $b_0, b_1, \dots$ , relate to  
 142 transformed age as follows  
 143  $F(\text{chronological age}) = b_0 + b_1 CpG_1 + \dots + b_p CpG_p + \text{error}$

144 Note that the intercept term is denoted by  $b_0$ . The coefficient values can be found in the attached Excel file.

145 Based, on the coefficient values from the regression model, DNAmAge is estimated as follows  
 146  $DNAmAge = F^{-1}(b_0 + b_1 CpG_1 + \dots + b_p CpG_p)$

147 where  $F^{-1}(y)$  denotes the mathematical inverse of the function  $F(\cdot)$ . Thus, the regression model can be used  
 148 to predict to transformed age value by simply plugging the beta values of the selected CpGs into the  
 149 formula.

## 150 Defining Properties of the log linear transformation

151 As indicated by its name, the “log-linear” function, has a logarithmic dependence on age before the average  
 152 age of sexual maturity (of the species) and a linear dependence after Age at Sexual Maturity (of the species).  
 153 For the human-horse clocks we used the following averages at sexual maturity (in units of years): 13.5 years  
 154 for humans and 2.58493 years for horses.

### 155 Construction

156 We used a piecewise transformation, parameterized by Age of Sexual Maturity ( $A$ ).  
 157 The transformation is  $F(x)$ , given by

$$F(x) = g\left(\frac{x + 1.5}{A + 1.5}\right) \text{ where } g(t) = \begin{cases} \log(t), & \text{for } 0 \leq t \leq 1 \\ t - 1, & \text{for } 1 \leq t \end{cases}$$

158 Explicitly,  $F(x)$  is given by

$$F(x) = \begin{cases} \log\left(\frac{x + 1.5}{A + 1.5}\right), & \text{for } 0 \leq x \leq A \\ \frac{x - A}{A + 1.5}, & \text{for } A \leq x \end{cases}$$

159 In order to use this transformation to predict Age on new samples, one needs to use the *inverse*  
 160 transformation,  $F^{-1}(y)$ , given by

$$F^{-1}(y) = \begin{cases} (A + 1.5) * \exp(y) - 1.5, & \text{for } y \leq 0 \\ (A + 1.5)y + A, & \text{for } y \geq 0 \end{cases}$$

161 For predicting age, apply the inverse transformation to coefficient-weighted sum. That is,

$$DNAmAge = F^{-1}(x * \beta)$$

162 where  $\beta$  is the vector of coefficients and  $x$  is the vector of methylation values, with an intercept term.

163 The DNAm Age estimate is estimated in two steps.

164 First, one forms a weighted linear combination of the CpGs whose details can be found in Table  
 165 The table reports the probe identifier (cg number) used in the custom Infinium array  
 166 (HorvathMammalMethylChip40). The weights used in this linear combination are specified in the  
 167 respective column entitled "Coef."  
 168 The formula assumes that the DNA methylation data measure "beta" values but the formula could be  
 169 adapted to other ways of generating DNA methylation data.

170

171 Species characteristics of Equids according to anAge

For the sake of reader friendliness, we reproduce select species characteristics from the anAge data base about different equid species. Our age transformations make use of column "AgeSexualMaturity.Years", which is the average across male and female age at sexual maturity. The variable names indicate the units of time, e.g Days or Years.

The relative age estimate makes use of the maxLifespan which is in units of years.

| Species          | Latin Name     | GestationTime.days | maxLifespan.Years | AgeSexualMaturity.Years | Female.maturity.days | Male.maturity.days | AverageAdultWeight |
|------------------|----------------|--------------------|-------------------|-------------------------|----------------------|--------------------|--------------------|
| African wild ass | Equus asinus   | 359                | 47                | 2.347                   | 708                  | 1005               | 1.65E+05           |
| Horse            | Equus caballus | 337                | 57                | 2.585                   | 914                  | 973                | 3.00E+05           |
| Grevy's zebra    | Equus grevyi   | 406                | 31                | 3.752                   | 1278                 | 1461               | 3.84E+05           |
| Kulan            | Equus hemionus | 339                | 31.6              | 3.211                   | 1157                 | 1187               | 2.30E+05           |
| Kiang            | Equus kiang    | 299                | 30.1              | NA                      | NA                   | NA                 | 2.75E+05           |
| Quagga           | Equus quagga   | 365                | 38                | 2.466                   | 900                  | 900                | 2.80E+05           |
| Mountain zebra   | Equus zebra    | 362                | 33.2              | 3.134                   | 1009                 | 1279               | 2.96E+05           |

**Supplementary Table 1. Characteristics of equid species.** Rows correspond to different equid species in this article. Columns report gestation time (in units of days), maximum lifespan (in units of years), age at sexual maturity averaged across both sexes (in units of years), female age at sexual maturity (in units of days), male age at sexual maturity (in units of days), average adult weight (in grams). These values come from the anAge data base.

### The DNAm Age estimate is estimated in two steps.

First, one forms a weighted linear combination of the CpGs whose details can be found in the supplementary Excel file (**Supplementary Data 10**)

The file reports the probe identifier (cg number) used in the custom Infinium array (HorvathMammalMethylChip40). The weights used in this linear combination are specified in the respective column entitled "Coef."

The formula assumes that the DNA methylation data measure "beta" values but the formula could be adapted to other ways of generating DNA methylation data.

194  
195  
196  
197

## Supplementary Note 1. R software code for horse clocks

198 R Implementation of the log linear transformation

199 **### Applies the log linear transformation to the input vector x,i.e. to Age**

```
200 F= Vectorize(function(x, maturity, ...) {  
201   if (is.na(x) | is.na(maturity)) {return(NA)}  
202   k <- 1.5  
203   y <- 0  
204   if (x < maturity) {y = log((x+k)/(maturity+k))}  
205   else {y = (x-maturity)/(maturity+k)}  
206   return(y)  
207 }
```

208 **### Inverse log linear transformation**

```
209 F.inverse= Vectorize(function(y, maturity, ...) {  
210   if (is.na(y) | is.na(maturity)) {return(NA)}  
211  
212   k <- 1.5  
213   x <- 0  
214   if (y < 0) {x = (maturity+k)*exp(y)-k}  
215   else {x = (maturity+k)*y+maturity}  
216   return(x)  
217 }
```

218  
219 **# R function for multivariate regression model**

```
220 multivariatePredictorCoef=function(dat0, datCOEF,imputeValues=FALSE) {  
221   datout=data.frame(matrix(NA,nrow=dim(dat0)[[2]]-1,ncol=dim(datCOEF)[[2]]-1 ))  
222   match1=match(datCOEF[-1,1],dat0[,1] )  
223   if ( sum(!is.na(match1))==0 ) stop("Input error. The first column of dat0 does not contain CpG identifiers  
224   (cg numbers).")  
225   dat1=dat0[match1,]  
226   row.names1=as.character(dat1[,1])  
227   dat1=dat1[,-1]  
228   if (imputeValues) {dat1=impute.knn(data=as.matrix(dat1) ,k = 10)[[1]]}  
229   for (i in 1:dim(dat1)[[2]] ) { for (j in 2:dim(as.matrix(datCOEF)[[2]] ) {  
230     datout[i,j-1]=sum(dat1[,i]* datCOEF[-1,j],na.rm=TRUE)+ datCOEF[1,j]} }  
231   colnames(datout)=colnames(datCOEF)[-1]  
232   rownames(datout)=colnames(dat0)[-1]  
233   datout=data.frame(SampleID= colnames(dat0)[-1],datout)  
234   datout  
235 } # end of function
```

236  
237 **# read in supplementary table 10**

```
238 datCoef=read.csv("SupplementaryData10.csv")
```

239  
240 **The first columns should read as follows**

```
241 names(datCoef)
```

```

242     [1] "var"
243     [2] "Coef.HorseMultiTissue"
244     [3] "Coef.HorseBlood"
245     [4] "Coef.HorseLiver"
246     [5] "Coef.HumanHorseAgeLogLinear"
247     [6] "Coef.HumanHorseRelativeAge"
248     [7] "Coef.EquidBloodAgeLogLinear"
249
250 # Restrict attention to the first 7 columns
251 datCoef=datCoef[,c(1:7)]
252
253 match1=match(datCoef[-1,1],dat0[,1] )
254 missingProbes= as.character(datCoef[-1,1] )[is.na(match1)]
255
256 dat1=dat0[match1,]
257 # data frame with predicted values.
258 datPredictions=multivariatePredictorCoef(dat1,datCOEF=datCoef,imputeValues=FALSE)
259
260 #let's relabel the columns by replacing "Coef" with "DNAm" since the columns contain estimates of age or
261 relative age instead of coefficient values
262
263 colnames(datPredictions)=gsub(pattern="Coef", replacement="DNAm", x=colnames(datPredictions))
264 # We need to transform the human horse clock for chronological age using the inverse of the log linear
265 transformation.
266 For data from horses, the age at sexual maturity has to be set to 2.585 years.
267 datPredictions$DNAm.HumanHorseAgeLogLinear=
268 F.inverse(datPredictions$DNAm.HumanHorseAgeLogLinear, maturity= 2.585)
269 datPredictions$DNAm.EquidBloodAgeLogLinear=
270 F.inverse(datPredictions$DNAm.EquidBloodAgeLogLinear, maturity= 2.585)
271
272 The data frame "datPredictions" contains the age estimates in units of years and relative age estimates.
273
274
275
276
277
278

```

## References

- 1 McLean, C. Y. *et al.* GREAT improves functional interpretation of cis-regulatory regions. *Nat Biotechnol* **28**, doi:10.1038/nbt.1630 (2010).
- 2 Eppig, J. T., Blake, J. A., Bult, C. J., Kadin, J. A. & Richardson, J. E. The Mouse Genome Database (MGD): facilitating mouse as a model for human biology and disease. *Nucleic Acids Res* **43**, D726-736, doi:10.1093/nar/gku967 (2015).
- 3 Yu, G., Wang, L.-G. & He, Q.-Y. ChIPseeker: an R/Bioconductor package for ChIP peak annotation, comparison and visualization. *Bioinformatics* **31**, 2382-2383, doi:10.1093/bioinformatics/btv145 (2015).
- 4 Subramanian, A. *et al.* Gene set enrichment analysis: A knowledge-based approach for interpreting genome-wide expression profiles. *Proceedings of the National Academy of Sciences* **102**, 15545-15550, doi:10.1073/pnas.0506580102 (2005).

292 5 Liberzon, A. *et al.* Molecular signatures database (MSigDB) 3.0. *Bioinformatics* **27**, 1739-1740,  
293 doi:10.1093/bioinformatics/btr260 (2011).

294 6 Vu, H. & Ernst, J. Universal annotation of the human genome through integration of over a thousand  
295 epigenomic datasets. *bioRxiv*, 2020.2011.2017.387134, doi:10.1101/2020.11.17.387134 (2020).

296 7 Vu, H. & Ernst, J. Universal annotation of the human genome through integration of over a thousand  
297 epigenomic datasets. *bioRxiv*, 2020.2011.2017.387134, doi:10.1101/2020.11.17.387134 (2021).

298 8 Horvath, S. DNA methylation age of human tissues and cell types. *Genome Biol* **14**, R115,  
299 doi:10.1186/gb-2013-14-10-r115 (2013).

300
